# Supplementary material for: Income-related inequality in health and health-related behaviour: exploring the equalisation hypothesis
Source: PubMed Central journal article supplement — J Epidemiol Community Health. 2014 Mar 11;68(7):615–21. doi: 10.1136/jech-2013-203306 (PMC4112435; doi:10.1136/jech-2013-203306), 2014-03-11
Supplement: jech-2013-203306-s1.pdf [file jech-2013-203306-s1.pdf]

## Appendix A. Formulae of the Concentration Index

The formula for the Concentration Index (CI) of socioeconomic inequality can be written as follows:

$$CI = 1 - (2 * (1 - R_i)) \sum_{i=1}^n \frac{h_i}{n\mu}$$

where,  $n$  is the sample size;  $h_i$  is the health measure;  $\mu$  is the mean health measure

and  $R_i = \frac{i}{n}$  is the fractional rank in the income distribution of the  $i$ th person, with  $i = 1$

for the poorest and  $i = n$  for the richest.

To account for the bounded nature of the health variable (between zero and one) we applied Erreyger's correction to the concentration index. The formula for the corrected concentration index (CCI) is:

$$CCI = \frac{4 * \bar{y}}{a - b} * CI$$

where  $\bar{y}$  is mean health status and  $a$  and  $b$  are the maximum and minimum levels of health (in our case zero and one).
