# Supplementary material for: Income-related inequality in health and health-related behaviour: exploring the equalisation hypothesis
Source: PubMed Central journal article supplement — J Epidemiol Community Health. 2014 Mar 11;68(7):615–21. doi: 10.1136/jech-2013-203306 (PMC4112435; doi:10.1136/jech-2013-203306), 2014-03-11
Supplement: jech-2013-203306-s2.pdf [file jech-2013-203306-s2.pdf]

## Appendix B. Interval regression model of household income on individual and household characteristic

|                                   | Mean  | SD    | Coeff         | p-value |                                    | Mean  | SD    | Coeff         | p-value |
|-----------------------------------|-------|-------|---------------|---------|------------------------------------|-------|-------|---------------|---------|
| <b>Age and sex</b>                |       |       |               |         | <b>Number of cars in household</b> |       |       |               |         |
| Female                            | 0.538 | 0.499 | 641.3         | 0.455   | No car                             | 0.175 | 0.380 | Base category |         |
| Age/100                           | 0.398 | 0.234 | 63441.9       | 0.000   | One                                | 0.415 | 0.493 | 4196.9        | 0.000   |
| Age-squared/10000                 | 0.213 | 0.196 | -115474.2     | 0.000   | Two                                | 0.338 | 0.473 | 16297.3       | 0.000   |
| Age-cubed/1000000                 | 0.129 | 0.157 | 56022.3       | 0.000   | Three or more                      | 0.072 | 0.259 | 28151.9       | 0.000   |
| Female*age/100                    | 0.217 | 0.263 | -11821.0      | 0.167   | <b>Marital status</b>              |       |       |               |         |
| Female*age-squared/10000          | 0.116 | 0.181 | 21518.7       | 0.354   | Married                            | 0.486 | 0.500 | Base category |         |
| Female*age-cubed/1000000          | 0.070 | 0.134 | -7265.9       | 0.684   | Single                             | 0.163 | 0.369 | -2668.8       | 0.000   |
| <b>Economic activity</b>          |       |       |               |         | Separated                          | 0.014 | 0.118 | -4971.4       | 0.000   |
| In paid employment                | 0.443 | 0.497 | Base category |         | Divorced                           | 0.046 | 0.209 | -5490.2       | 0.000   |
| Going to school/college full time | 0.039 | 0.193 | 2381.8        | 0.006   | Widowed                            | 0.062 | 0.241 | -3489.3       | 0.000   |
| Permanent long term sickness      | 0.029 | 0.167 | -10442.2      | 0.000   | Missing (incl. under 15)           | 0.182 | 0.386 | -2927.9       | 0.546   |
| Retired from paid work            | 0.187 | 0.390 | -7746.1       | 0.000   | <b>Tenure</b>                      |       |       |               |         |
| Looking after the home            | 0.066 | 0.248 | -2950.1       | 0.000   | Own                                | 0.262 | 0.439 | Base category |         |
| Waiting to take up paid job       | 0.002 | 0.044 | -2956.2       | 0.337   | Mortgage                           | 0.449 | 0.497 | 5677.0        | 0.000   |
| Looking for paid job              | 0.016 | 0.126 | -11089.4      | 0.000   | Part mortgage                      | 0.005 | 0.073 | -9237.8       | 0.000   |
| Temporary sickness or injury      | 0.003 | 0.055 | -12540.1      | 0.000   | Rent                               | 0.276 | 0.447 | -8095.3       | 0.000   |
| Missing (incl. under 15)          | 0.183 | 0.387 | 8359.3        | 0.272   | Free rent                          | 0.008 | 0.089 | -7809.0       | 0.000   |
| <b>Education</b>                  |       |       |               |         | <b>Area of residence</b>           |       |       |               |         |
| Degree                            | 0.166 | 0.372 | Base category |         | London                             | 0.100 | 0.299 | Base category |         |
| Higher education less than degree | 0.089 | 0.285 | -11095.4      | 0.000   | North East                         | 0.064 | 0.245 | -15222.9      | 0.000   |
| A level or equivalent             | 0.109 | 0.312 | -11066.1      | 0.000   | North West                         | 0.144 | 0.351 | -13609.4      | 0.000   |
| GCSE or equivalent                | 0.180 | 0.384 | -14659.7      | 0.000   | Yorkshire                          | 0.103 | 0.304 | -14498.1      | 0.000   |
| CSE or equivalent                 | 0.038 | 0.191 | -16874.2      | 0.000   | East midlands                      | 0.093 | 0.291 | -15277.0      | 0.000   |
| Other qualification               | 0.013 | 0.113 | -16564.5      | 0.000   | West midlands                      | 0.105 | 0.306 | -14776.6      | 0.000   |
| No qualification                  | 0.191 | 0.393 | -16425.9      | 0.000   | East of England                    | 0.119 | 0.324 | -10379.3      | 0.000   |
| Missing (incl. under 15)          | 0.183 | 0.387 | -13857.8      | 0.009   | South East                         | 0.171 | 0.376 | -7397.9       | 0.000   |
| <b>Ethnic group</b>               |       |       |               |         | South West                         | 0.102 | 0.302 | -14291.7      | 0.000   |
| White                             | 0.903 | 0.296 | Base category |         | <b>Year of data</b>                |       |       |               |         |
| Black Caribbean                   | 0.011 | 0.102 | -8307.8       | 0.000   | 2006                               | 0.292 | 0.455 | Base category |         |
| Black African                     | 0.012 | 0.111 | -11512.4      | 0.000   | 2007                               | 0.137 | 0.344 | 773.7         | 0.300   |
| Indian                            | 0.021 | 0.142 | -6047.2       | 0.001   | 2008                               | 0.303 | 0.459 | 2380.0        | 0.000   |
| Pakistani                         | 0.013 | 0.115 | -13824.3      | 0.000   | 2009                               | 0.097 | 0.295 | 2929.7        | 0.000   |
| Bangladeshi                       | 0.004 | 0.063 | -18085.8      | 0.000   | 2010                               | 0.172 | 0.377 | 4076.2        | 0.000   |
| Chinese                           | 0.003 | 0.056 | -5613.1       | 0.051   |                                    |       |       |               |         |
| Other                             | 0.021 | 0.143 | -5014.9       | 0.001   |                                    |       |       |               |         |
